# Supplementary material
Source: HighWire-hosted journal article supplement (doi:10.1101/rna.075929.120)
Supplement: Supplemental_Legends.docx [file Supplemental_Legends.docx]

**Supplemental Information**

**Supplemental Figure S1: Principle Component Analysis demonstrates that cell types cluster together with each dataset analyzed (related to Figure 2)**. Principle Component Analysis (PCA) was run on the gene expression values, derived as described in Figure 1c, from RNA-Seq data obtained from 11 distinct studies. Individual samples within each dataset are plotted according to their values of the top two components (PC1, PC2) and colored by T cell subtype. Plots for each dataset are in the same order as in Figure 1A: (a) Ab (ref), (b) Mo (ref), (c) Ra (ref), (d) Bl (this study), (e) He (ref), (f) Lo (ref), (g) Re (ref), (h) Si (ref), (i) Hn (ref), (j) Ka (ref), (k) Tu (ref).

**Supplemental Figure S2: Expression of T subtype-associated cytokine genes across samples analyzed in this study (related to Figure 4).** Reliably expressed T Helper genes, ranked by number of supporting datasets and log2FC differences as in Figure 4. Leftmost segment indicates whether a given core T Helper gene was reliably more highly expressed in a given subset over others. All differential expression analyses were performed between samples from the same dataset. The datasets with Treg samples lacked Th0 samples, so there is no “enriched in Treg vs Th0” column. Some T Helper subsets share reliably expressed genes, as indicated by black boxes in multiple columns across a single row. The heatmap shows inverse hyperbolic sine (asinh)-transformed TPMs. Each column is a sample, and samples are grouped by cell type and author. Gene names are on the right. Arrow denotes cut-off of top 20 genes shown in Figure 4.

**Supplemental Figure S3: Correlation of expression of master regulator genes with other genes consistently enriched in the subtype (related to Figure 4).** Gene expression was correlated in a pairwise fashion between master regulator (top of column) and individual subtype-biased genes. Colors indicate the correlation value as indicated in key.

**Supplemental Figure S4: RIN values for in house CD4+ T cell RNA-Seq**

**Supplemental Table S1: (Related to Figure 1) RNA-Sequencing technical specifications.**

**Supplemental Table S2: (Related to Figure 1) Purification methods for cell populations used in this study**

**Supplemental Table S3: (related to Figure 4) Genes consistently expressed in each T cell subset**

**Supplemental Table S4: (related to Figure 5) Genes exhibiting consistent alternative splicing patterns in each T cell subset**
